# Supplementary material
Source: publisher site journal article supplement (https://www.kjim.org/upload/media/kjim-2025-171-Supplementary-Table-4.pdf)
Supplement: Supplementary file 1 [file kjim-2025-171-Supplementary-Table-4.pdf]

**Supplementary Table 4. The hazard ratio (95% CI) for the incidence risk of hepatobiliary diseases following zoster vaccination in the propensity score-matched cohort**

|                            | Events, n (%)   | Incidence rate <sup>b)</sup> | aHR (95% CI)                      |                                   |
|----------------------------|-----------------|------------------------------|-----------------------------------|-----------------------------------|
|                            |                 |                              | Model 1 <sup>c)</sup>             | Model 2 <sup>d)</sup>             |
| Any hepatobiliary events   |                 |                              |                                   |                                   |
| Unvaccinated               | 108,007 (14.77) | 29.75                        | 1.0 (reference)                   | 1.0 (reference)                   |
| Vaccinated                 | 89,764 (12.28)  | 26.93                        | 0.86 (0.86 to 0.87) <sup>e)</sup> | 0.86 (0.85 to 0.87) <sup>e)</sup> |
| Hepatic failure            |                 |                              |                                   |                                   |
| Unvaccinated               | 824 (0.11)      | 0.20                         | 1.0 (reference)                   | 1.0 (reference)                   |
| Vaccinated                 | 563 (0.08)      | 0.15                         | 0.71 (0.64 to 0.79) <sup>e)</sup> | 0.71 (0.63 to 0.78) <sup>e)</sup> |
| Inflammatory liver disease |                 |                              |                                   |                                   |
| Unvaccinated               | 43,846 (6.00)   | 11.14                        | 1.0 (reference)                   | 1.0 (reference)                   |
| Vaccinated                 | 36,502 (4.99)   | 10.23                        | 0.88 (0.86 to 0.89) <sup>e)</sup> | 0.87 (0.86 to 0.88) <sup>e)</sup> |
| Liver cirrhosis            |                 |                              |                                   |                                   |
| Unvaccinated               | 3,394 (0.46)    | 0.82                         | 1.0 (reference)                   | 1.0 (reference)                   |
| Vaccinated                 | 2,405 (0.33)    | 0.65                         | 0.75 (0.71 to 0.79) <sup>e)</sup> | 0.74 (0.70 to 0.77) <sup>e)</sup> |
| Chronic hepatitis          |                 |                              |                                   |                                   |
| Unvaccinated               | 23,765 (3.25)   | 5.91                         | 1.0 (reference)                   | 1.0 (reference)                   |
| Vaccinated                 | 18,599 (2.54)   | 5.11                         | 0.82 (0.81 to 0.84) <sup>e)</sup> | 0.81 (0.80 to 0.83) <sup>e)</sup> |
| Cholecystitis, cholangitis |                 |                              |                                   |                                   |
| Unvaccinated               | 9,176 (1.26)    | 2.24                         | 1.0 (reference)                   | 1.0 (reference)                   |
| Vaccinated                 | 7,197 (0.98)    | 1.95                         | 0.83 (0.81 to 0.86) <sup>e)</sup> | 0.82 (0.80 to 0.85) <sup>e)</sup> |
| Cholelithiasis             |                 |                              |                                   |                                   |
| Unvaccinated               | 19,980 (2.73)   | 4.95                         | 1.0 (reference)                   | 1.0 (reference)                   |
| Vaccinated                 | 15,643 (2.14)   | 4.28                         | 0.83 (0.81 to 0.84) <sup>e)</sup> | 0.82 (0.80 to 0.84) <sup>e)</sup> |
| Acute pancreatitis         |                 |                              |                                   |                                   |
| Unvaccinated               | 4,251 (0.58)    | 1.03                         | 1.0 (reference)                   | 1.0 (reference)                   |
| Vaccinated                 | 3,429 (0.47)    | 0.93                         | 0.85 (0.81 to 0.89) <sup>e)</sup> | 0.84 (0.80 to 0.88) <sup>e)</sup> |
| Others <sup>a)</sup>       |                 |                              |                                   |                                   |
| Unvaccinated               | 24,549 (3.36)   | 6.10                         | 1.0 (reference)                   | 1.0 (reference)                   |
| Vaccinated                 | 22,072 (3.02)   | 6.08                         | 0.95 (0.94 to 0.97) <sup>e)</sup> | 0.95 (0.93 to 0.96) <sup>e)</sup> |

aHR, adjusted hazard ratio; CI, confidence interval.

<sup>a)</sup>Others include other diseases of the gallbladder and pancreas.

<sup>b)</sup>Incidence rate expressed as per 1,000 person-years.

<sup>c)</sup>Models 1: adjusted for age (50–54, 55–59, 60–64, and ≥ 65 years) and sex.

<sup>d)</sup>Model 2: adjusted for age (50–54, 55–59, 60–64, and ≥ 65 years); sex; household income (low income, middle income, and high income); region of residence (urban and rural); Charlson comorbidity index (0, 1, and ≥ 2); obesity (underweight [ $< 18.5 \text{ kg/m}^2$ ], normal [ $18.5\text{--}22.9 \text{ kg/m}^2$ ], overweight [ $23.0\text{--}24.9 \text{ kg/m}^2$ ], and obese [ $\geq 25.0 \text{ kg/m}^2$ ]); blood pressure (systolic blood pressure  $< 140 \text{ mmHg}$  and diastolic blood pressure  $< 90 \text{ mmHg}$  and systolic blood pressure  $\geq 140 \text{ mmHg}$  or diastolic blood pressure  $\geq 90 \text{ mmHg}$ ); fasting blood glucose ( $< 100$  and  $\geq 100 \text{ mg/dL}$ ); glomerular filtration rate ( $< 60$ ,  $60\text{--}89$ , and  $\geq 90 \text{ mL/min/1.73 m}^2$ ); smoking status (non-, ex-, and current smoker); alcohol consumption (drinks;  $< 1$ ,  $1\text{--}2$ ,  $3\text{--}4$ , and  $\geq 5$  days per week); aerobic physical activity (sufficient and insufficient); and history of medication use for coronary artery disease, diabetes mellitus, dyslipidemia, and hypertension.

<sup>e)</sup>Significant differences ( $p < 0.05$ ).
